# Supplementary material
Source: PubMed Central journal article supplement (PMC4409668)

Figure S1: Gel retardation study of polyplexes. Base and Guan copolymers were complexed with plasmid DNA at various charge ratios, with and without heparin ("H"), and DNA condensation was analyzed by gel electrophoresis.

### Base Copolymer

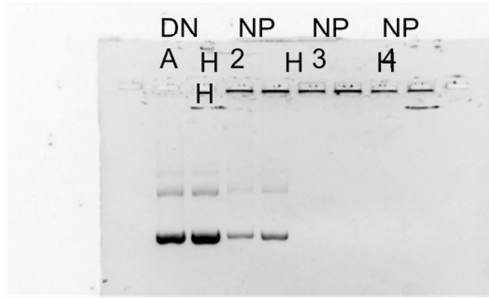

### Guan Copolymer

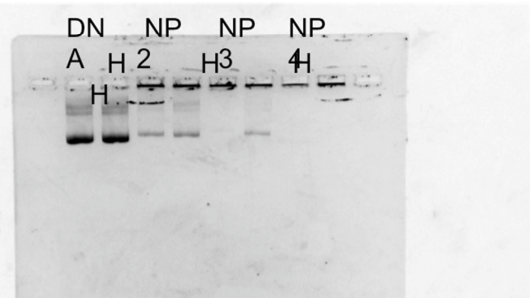

Supplement: NIHMS671302-supplement-01.pdf [file NIHMS671302-supplement-01.pdf]
